# Supplementary material
Source: PubMed Central journal article supplement (PMC4925148)
Supplement: NIHMS795982-supplement-Supporting_info.pdf [file NIHMS795982-supplement-Supporting_info.pdf]

Supporting Information for Publication

# Targeting Electrostatic Interactions in Accelerated Molecular Dynamics with Application to Protein Partial Unfolding

*Jose C. Flores-Canales, and Maria Kurnikova\**

Department of Chemistry, Carnegie Mellon University, Pittsburgh, Pennsylvania 15213, United States

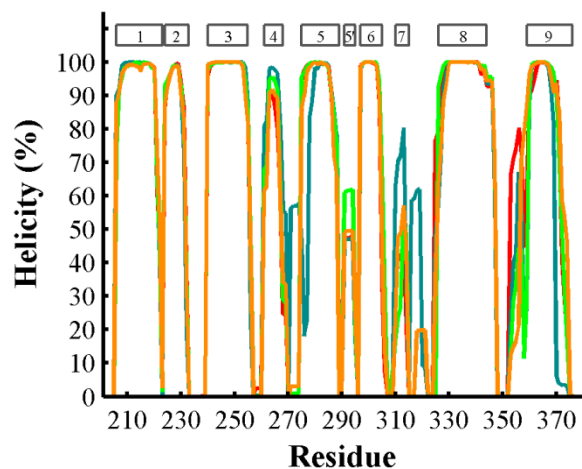

**Figure S1.** Average helicity content per residue shown as a percentage. Four independent trajectories generated by dual-boost aMD are represented by orange, dark cyan, green and red lines. Helices TH1-9, TH5' are represented by rectangles on the top of the figure. Simulation lengths of all trajectories vary within 140 – 150 ns.
